# Supplementary material
Source: PubMed Central journal article supplement (PMC3021969)
Supplement: pr1005247_si_002.pdf [file pr1005247_si_002.pdf]

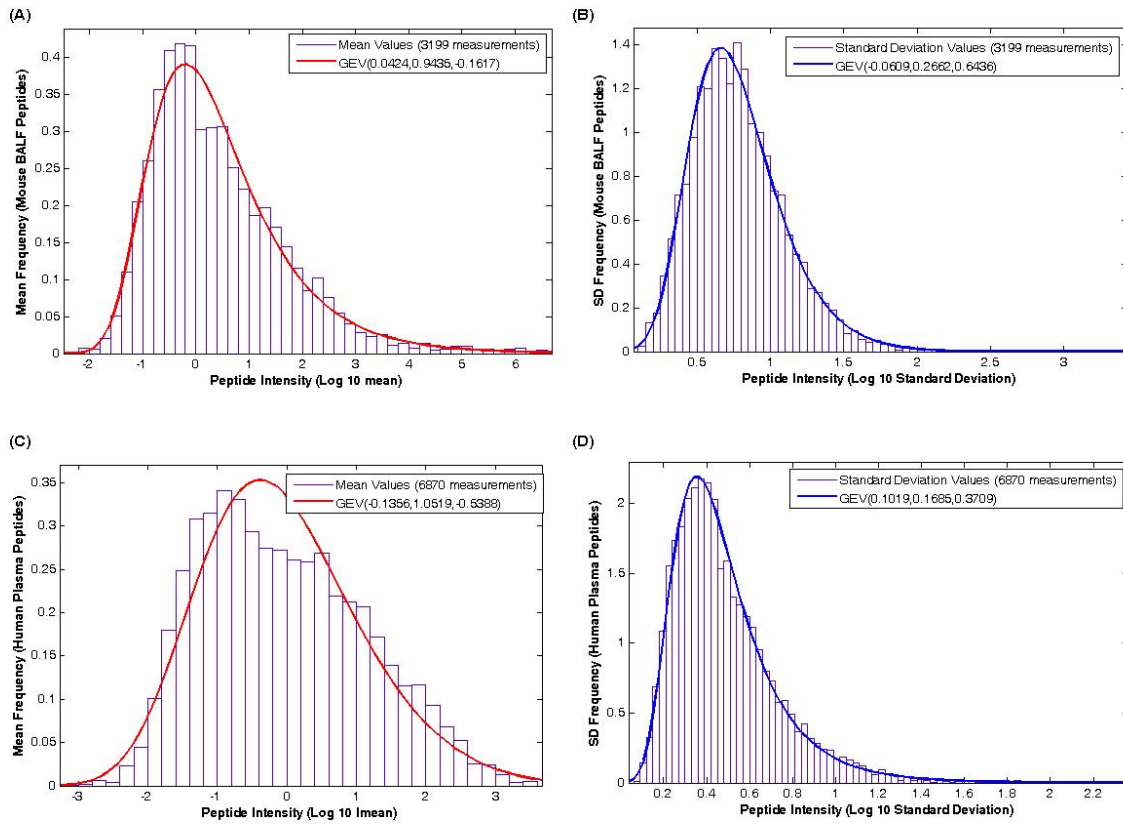

**Figure S1.** Distribution fits to a Generalized Extreme Value distribution of the means and standard deviations for the simBALF and simPlasma datasets.
