# Supplementary material
Source: PubMed Central journal article supplement (PMC3021969)
Supplement: pr1005247_si_003.pdf [file pr1005247_si_003.pdf]

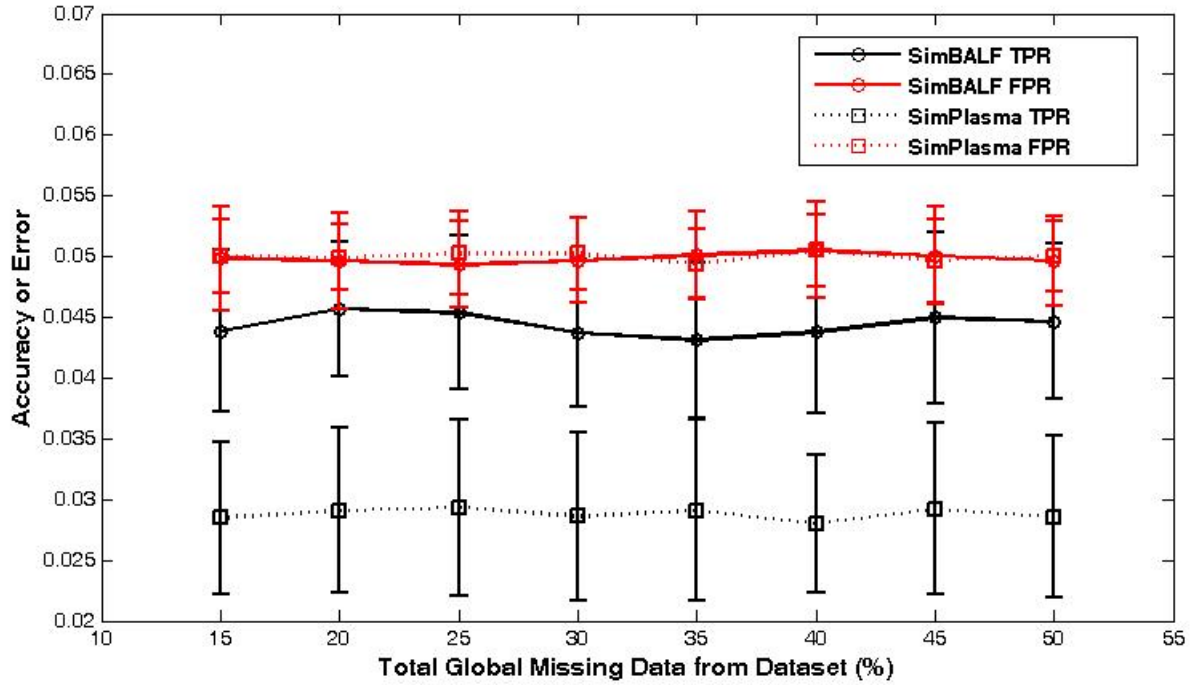

**Figure S2.** The TPR and FPR for identification of statistically significant censored peptides in the simulated datasets are near those rates expected by chance alone.
