# Supplementary material
Source: PubMed Central journal article supplement (PMC3021969)
Supplement: pr1005247_si_004.pdf [file pr1005247_si_004.pdf]

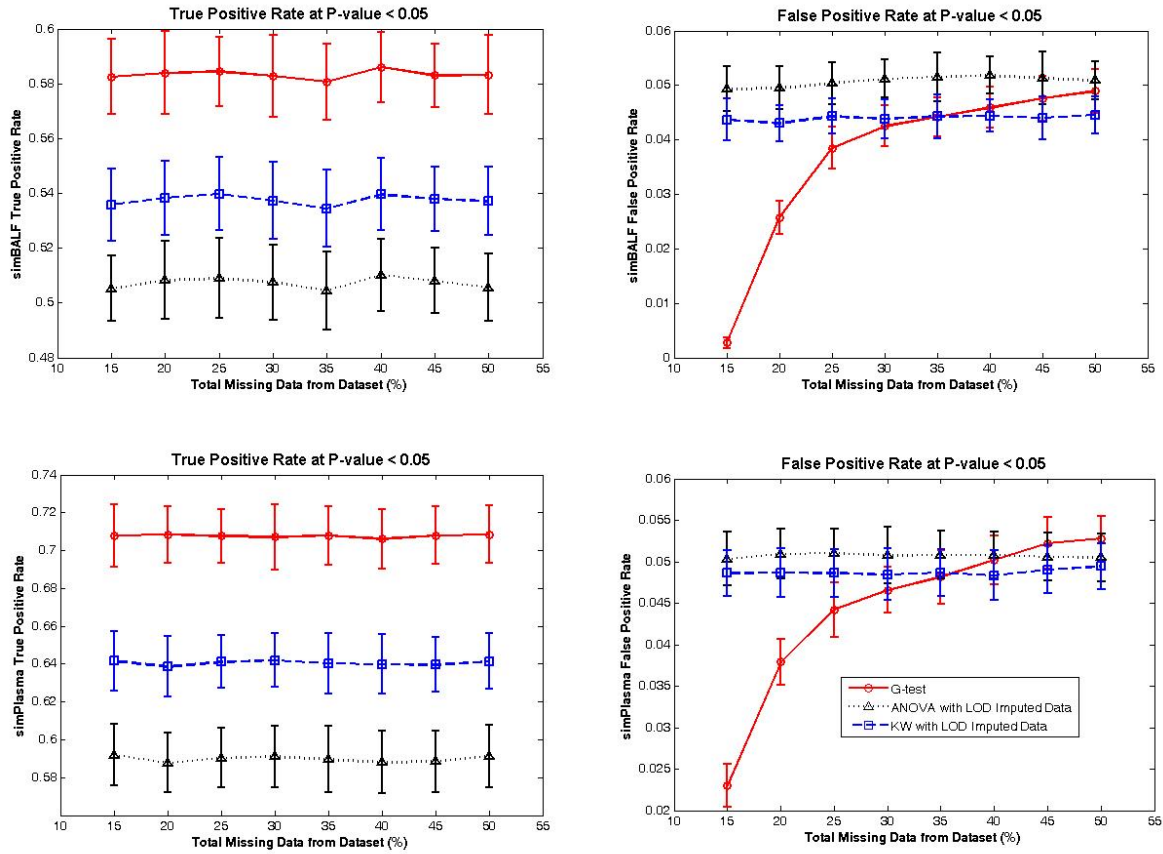

**Figure S3.** The true (A) and false (B) positive rates, respectively, for simBALF and true (C) and false (D) positive rates, respectively, for simPlasma. Data represent the mean and one SD from analyzing 100 simulated datasets.
