# Supplementary material
Source: PubMed Central journal article supplement (PMC3021969)
Supplement: pr1005247_si_006.pdf [file pr1005247_si_006.pdf]

```

function [G_FilterNumber] = IP_GFilter(Groups,num_g,nk,G_thres)

% Groups is a vector of class indices associated with each observation in Peptide_Vector. This vector
% is numeric and sequential, which means that if there are 4 classes, then each position in
% Peptide_Vector will be represented in "Groups" as a 1,2,3 or a 4. If the data are in another
% format, such as a Cell structure it would need to be converted.

% num_g is a constant that defines how many groups are present in the data.

% nk is a vector of length num_g that identifies how many samples are associated with group k

% G_thres is the significance value required to identify the minimum number of observations required
% in a single group (G-filter): (0.05 in paper)

G_FilterNumber = zeros(1,num_g);
N = length(Groups);
for i = 1:num_g
    Peptide_Vector = NaN(N,1);
    temp = NaN(nk(i),1);
    GTest_pvalue = 1;
    t = 0;
    % if GTest_pvalue is less than the defined threshold than stop, otherwise t must be increased. If t is equal to nk(i)
    % and GTest_pvalue is still not less than threshold than set equal to the size of the group.
    while GTest_pvalue > G_thres && t < nk(i)
        t = t+1;
        temp(t) = 1;
        Peptide_Vector(Groups == i) = temp;
        GTest_pvalue = GTest(Peptide_Vector,Groups);
    end
    G_FilterNumber(i) = t;
end
end

```

**Figure S5.** Generic MatLab® code for computing the number of peptides retained in each group using the G-Filter as described in Equation 3.
